# Supplementary material for: Designing New Sport Supplements Based on Aronia melanocarpa and Bee Pollen to Enhance Antioxidant Capacity and Nutritional Value
Source: MDPI journal article supplement (doi:10.3390/molecules28196944), 2023-10-05
Supplement: s1 [file s1]

## Supplementary material

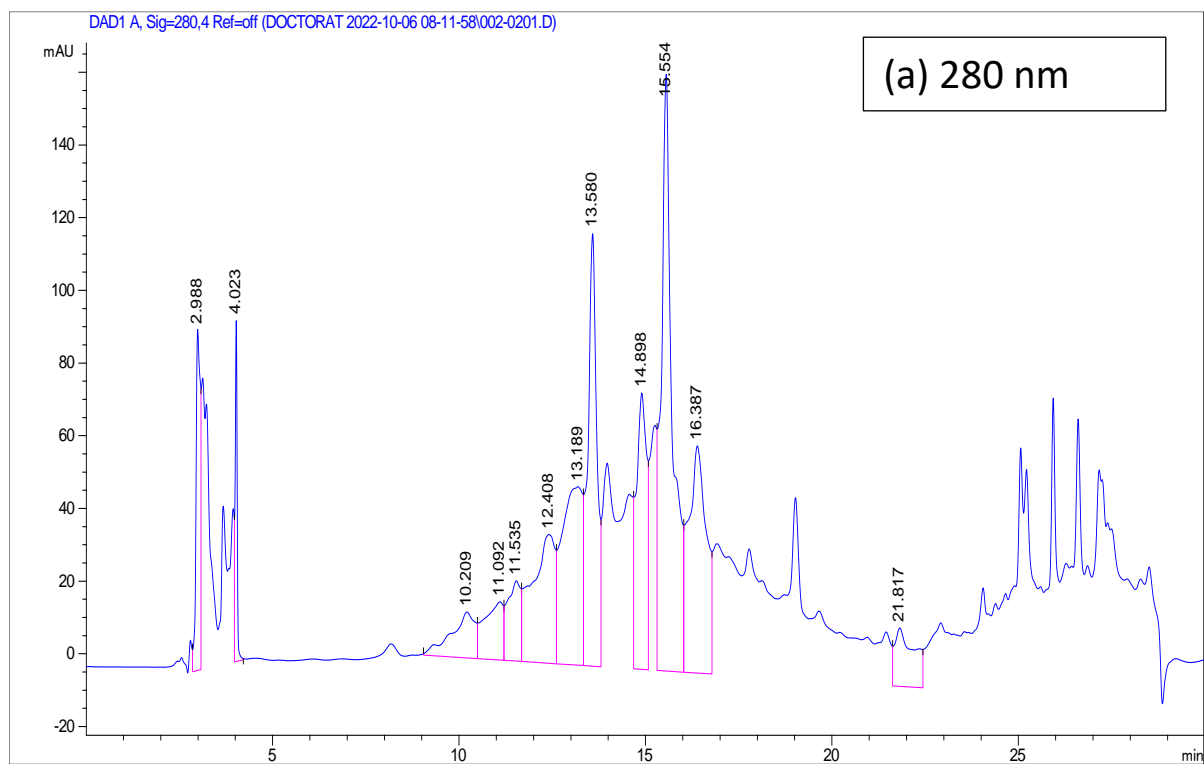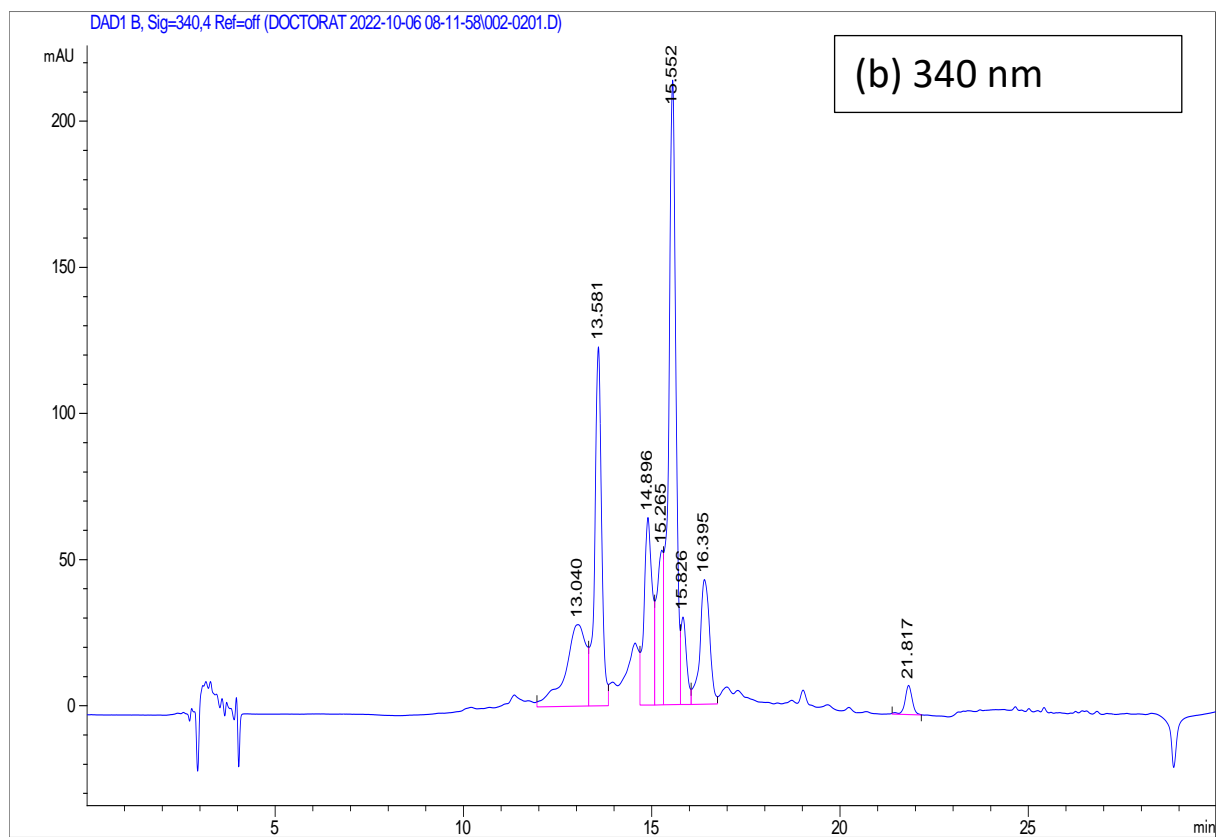

## Supplementary material

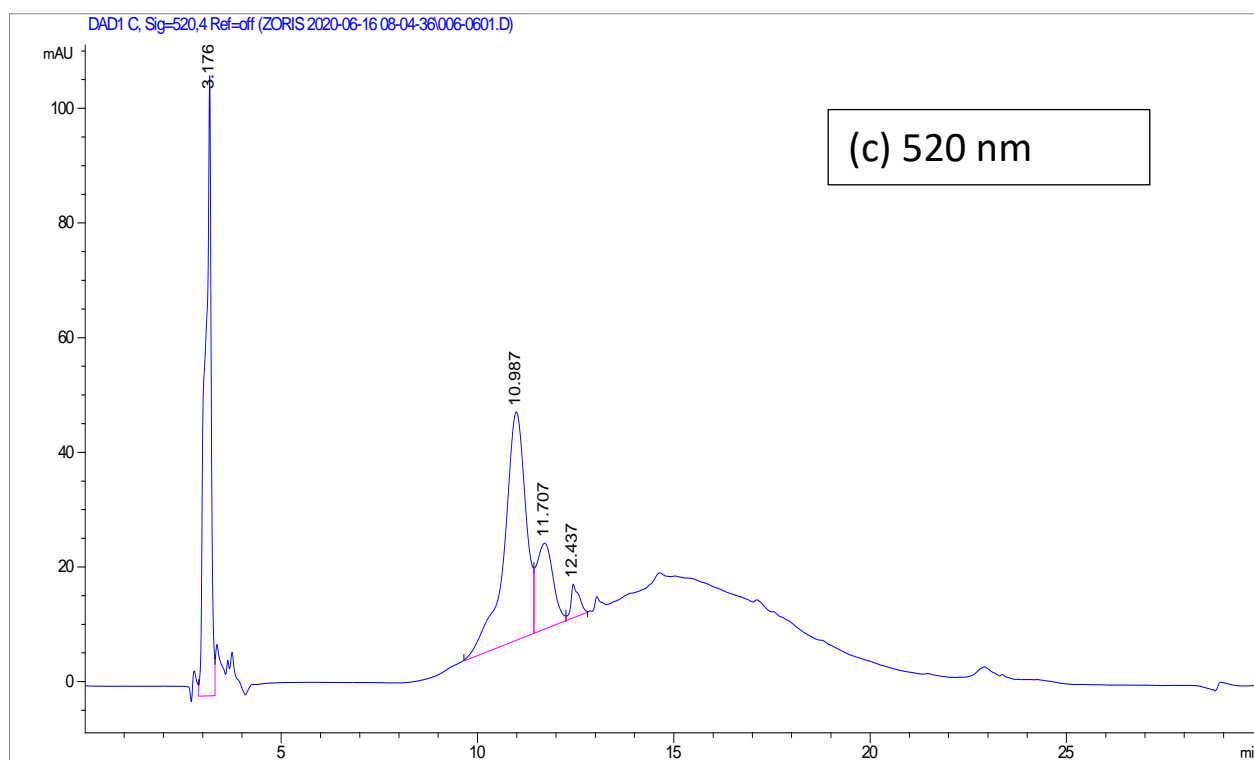

**Figure S1.** HPLC chromatograms of Aronia sample recorded at different wavelength. **(a)** 280 nm; **(b)** 340 nm and **(c)** 520 nm.

## Supplementary material

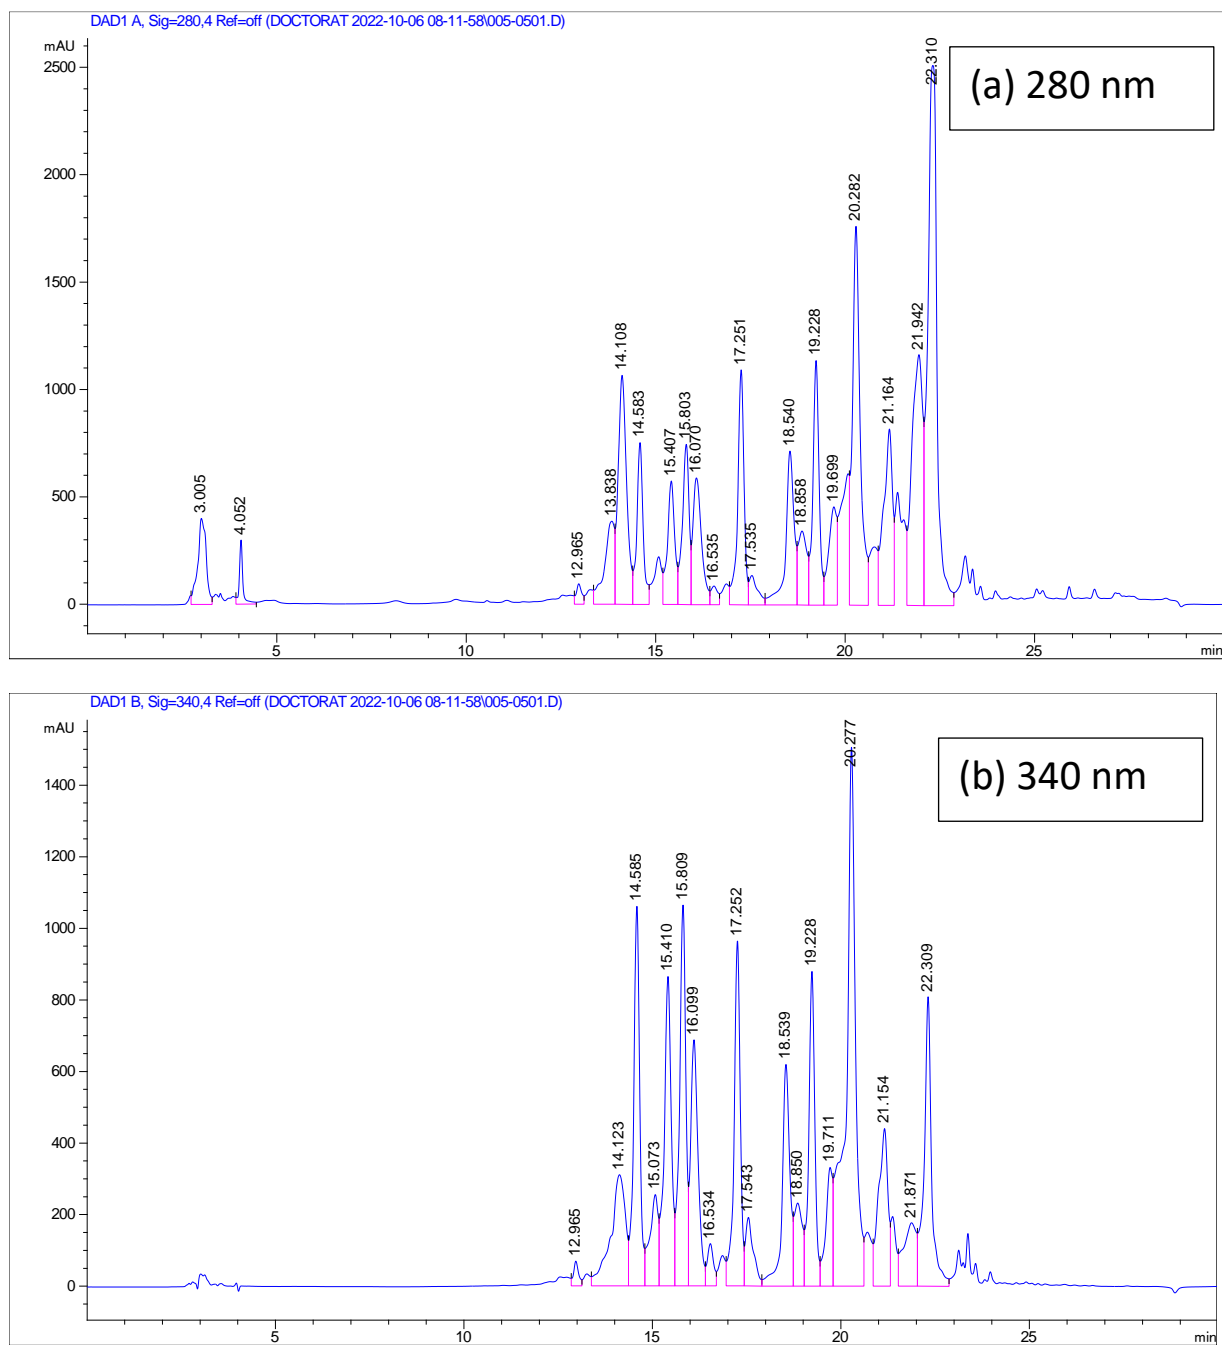

**Figure S2.** HPLC chromatograms of pollen sample recorded at different wavelength: (a) 280 nm and (b) 340 nm.
